# Supplementary material for: Ten actions to achieve gender equity among intensivists: the French Society of Intensive Care (FICS) model
Source: PubMed Central journal article supplement (PMC9250559; doi:10.1186/s13613-022-01035-3), 2022-07-02
Supplement: 13613_2022_1035_MOESM1_ESM.pdf [file 13613_2022_1035_MOESM1_ESM.pdf]

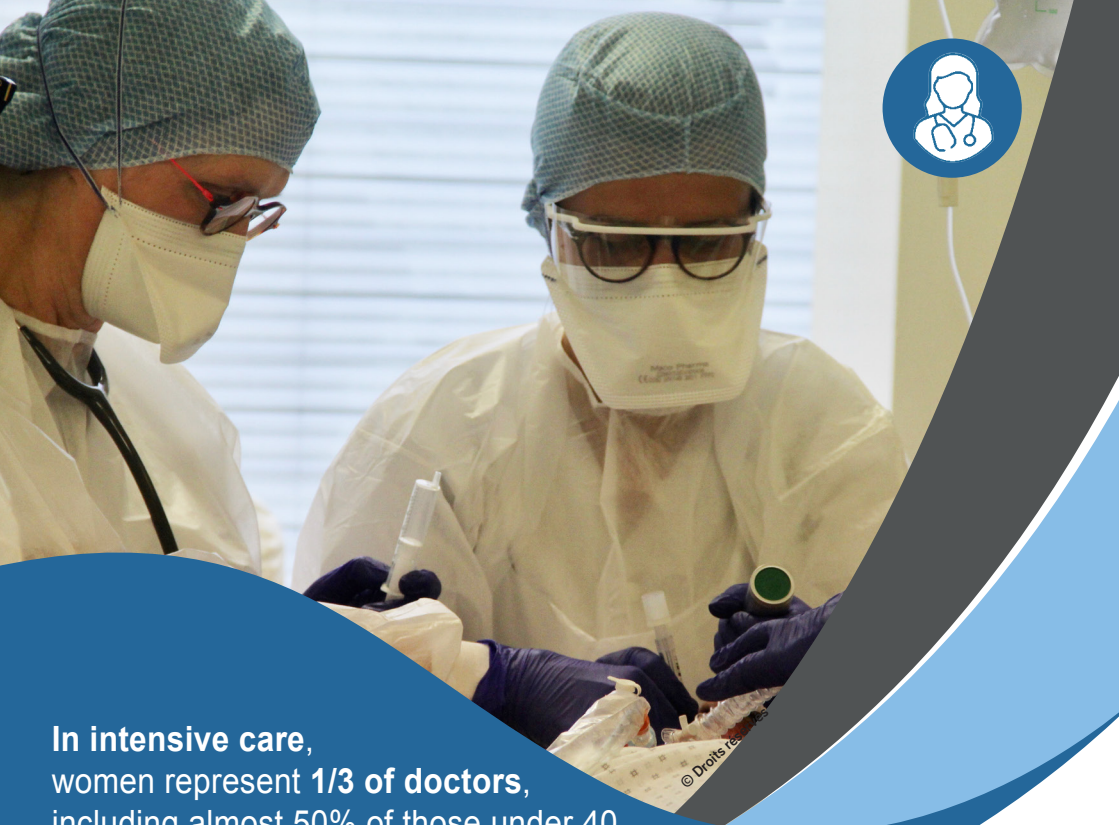

**In intensive care,**  
women represent **1/3 of doctors**,  
including almost 50% of those under 40.  
**Only 9%** are professors or reach  
an academic career.

# FEMMIR

A working group for  
**Women doctors in Intensive care medicine**

- One group, 3 main objectives:
- improving working conditions
  - reaching parity within FICS and intensive care medicine
  - improving attractiveness of our specialty for young doctors

# OUR ACTIONS

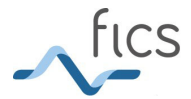

to improve the representation of women in our medical specialty

## »» PARITY WITHIN THE FICS

Amendment of rules of procedure and statutes of FICS, identification of positions for women and parity within the Executive Board.

## »» VISIBILITY OF WOMEN

Networking to increase the visibility of women in the discipline among professors and speakers at our national conference.

## »» SCIENTIFIC PUBLICATIONS

Research activities on gender in intensive care, two publications already published and several research projects in progress.

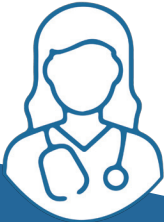

## »» TRAINING SESSIONS / AWARENESS ACTIONS

Workshops on unconscious biases and on development of self-confidence.  
Interventions to sensitize our entire community on gender inequalities.

# OUR REQUESTS

Help us to make the difference by granting us:

## »» A LISTENING TIME

## »» A REAL INSTITUTIONAL COOPERATION

## »» A FINANCIAL SUPPORT

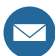

Contact us  
[femmir@srlf.org](mailto:femmir@srlf.org)

[www.srlf.org/femmir](http://www.srlf.org/femmir)
